# Supplementary material
Source: PubMed Central journal article supplement (PMC2740933)

**A**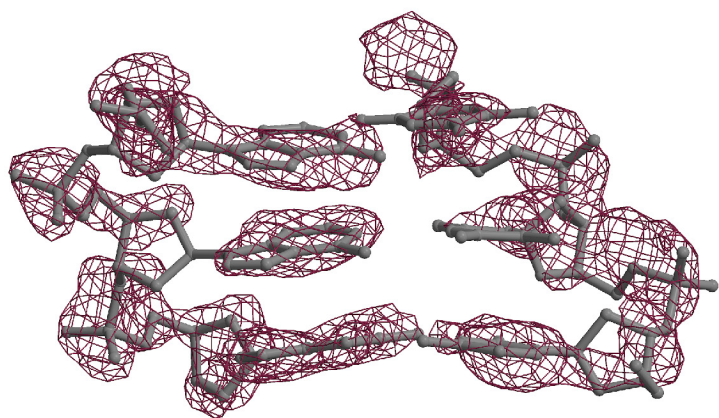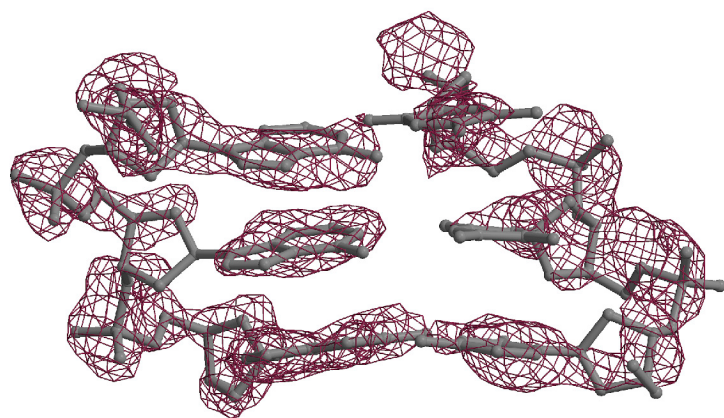**B**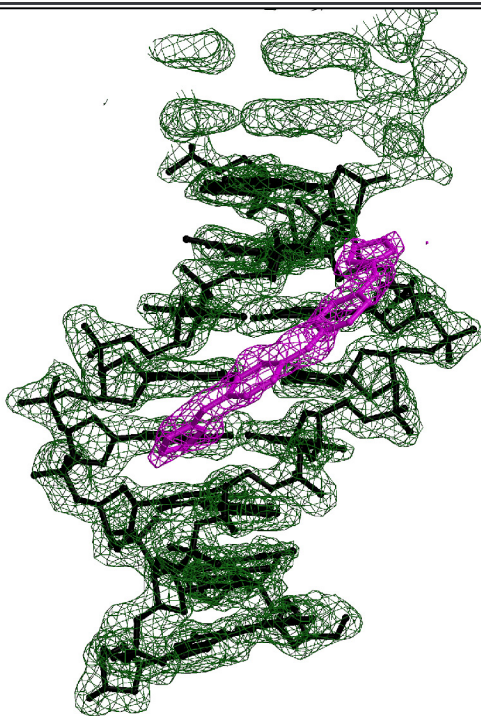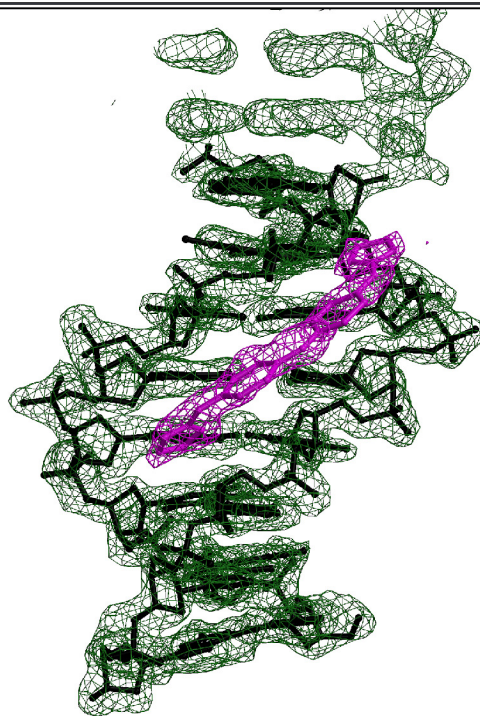

Supplement: NIHMS118904-supplement-2_si_002.pdf [file NIHMS118904-supplement-2_si_002.pdf]
